# Supplementary material for: A bifunctional two dimensional TM3(HHTP)2monolayer and its variations for oxygen electrode reactions
Source: Royal Society of Chemistry journal article supplement (doi:10.1039/c7ra09974f), 2017-01-01
Supplement: c7ra09974f1.pdf [file c7ra09974f1.pdf]

## Supplementary Information

*for*

### **A Bifunctional Two Dimensional $\text{TM}_3(\text{HHTP})_2$ monolayer and its variations for Oxygen Electrode Reactions**

B. B. Xiao<sup>a\*</sup>, H. Y. Liu<sup>a</sup>, X. B. Jiang<sup>b</sup>, Z. D. Yu<sup>a</sup>, Q. Jiang<sup>c\*</sup>

*<sup>a</sup>School of Energy and Power Engineering, Jiangsu University of Science and Technology, 212003, Zhenjiang, Jiangsu, China*

*<sup>b</sup>School of Materials Science and Engineering, Jiangsu University of Science and Technology, 212003, Zhenjiang, Jiangsu, China*

*<sup>c</sup>Key Laboratory of Automobile Materials (Jilin University), Ministry of Education, and School of Materials Science and Engineering, Jilin University, Changchun 130022, China.*

---

\*Correspondence and requests for materials should be addressed to B. B. X. (email: xiaobb11@mails.jlu.edu.cn) and Q. J. (email: jiangq@jlu.edu.cn).

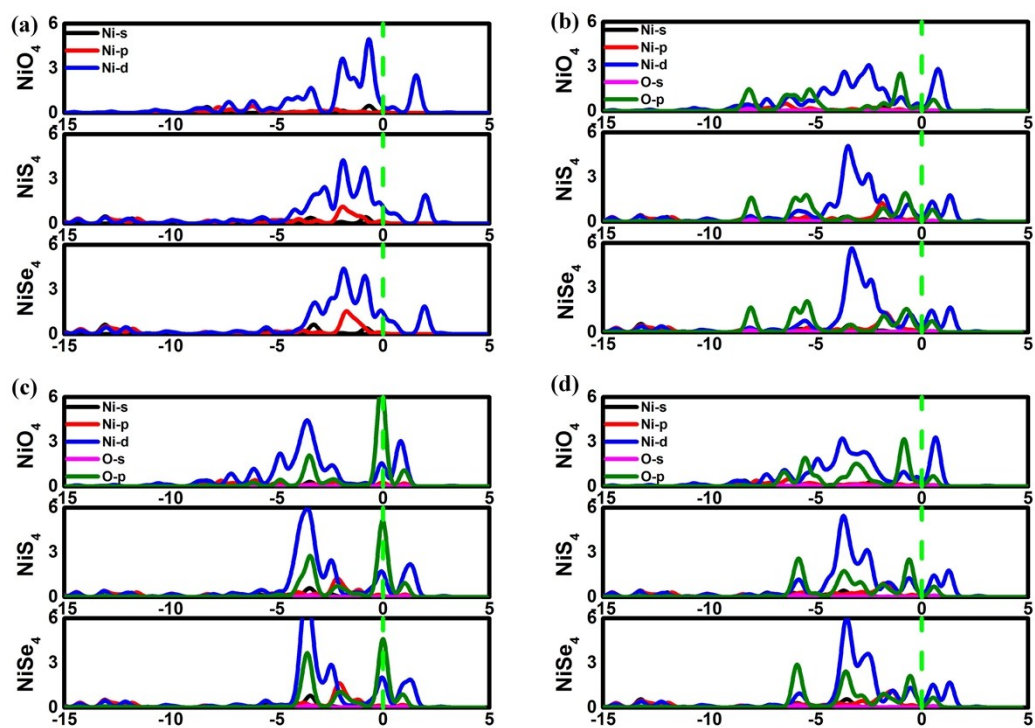

**Figure S1.** The partially density of states of  $\text{Ni}_3(\text{HHTP})_2$  and its variations. (a) is the un-adsorbed  $\text{NiX}_4$ . (b)-(c) are OOH, O and OH adsorption systems, respectively.

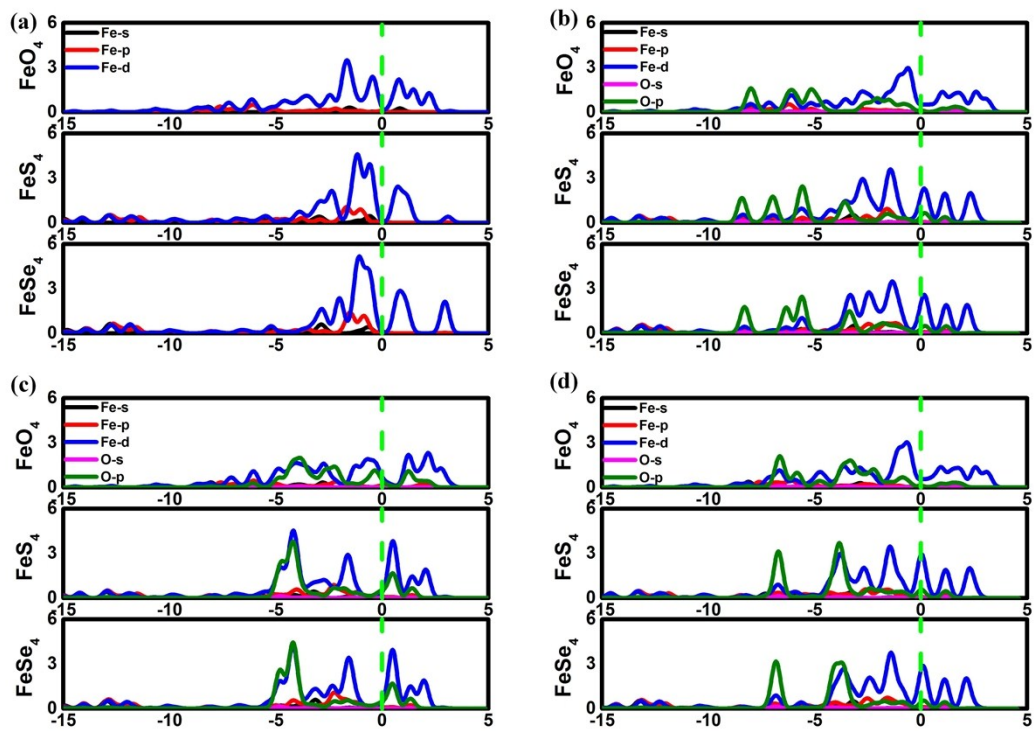

**Figure S2.** The partially density of states of  $\text{Fe}_3(\text{HHTP})_2$  and its variations. (a) is the un-adsorbed  $\text{FeX}_4$ . (b)-(c) are OOH, O and OH adsorption systems, respectively.
